# Supplementary material for: Auf dem Weg zur integrierten Qualitätssicherung im Rettungsdienst
Source: Springer Nature journal article supplement (doi:10.1007/s10049-018-0440-9), 2018-04-13
Supplement: MOESM1 [file 15633590]

Aussagen zur Qualitätssicherung aus den Landesrettungsdienstgesetzen:

| **Land 🡪** | | **BW** | **BY** | **BE** | **BB** | **HB** | **HH** | **HE** | **MV** | **NI** | **NW** | **RP** | **SL** | **SN** | **ST** | **SH** | **TH** |
| --- | --- | --- | --- | --- | --- | --- | --- | --- | --- | --- | --- | --- | --- | --- | --- | --- | --- |
| **Gesetz** | | [RDG vom 8. Februar 2010](http://www.landesrecht-bw.de/jportal/?quelle=jlink&query=RettDG+BW&psml=bsbawueprod.psml&max=true&aiz=true), zuletzt geändert 17.12.2015 | [BayRDG](http://www.gesetze-bayern.de/Content/Document/BayRDG) vom 22. Juli 2008, zuletzt geändert 27.03.2017 | [RDG vom 8. Juli 1993](http://gesetze.berlin.de/jportal/?quelle=jlink&query=RettDG+BE&psml=bsbeprod.psml&max=true&aiz=true), zuletzt geändert 20.09.2016 | [BbgRettG](https://bravors.brandenburg.de/de/gesetze-212320) vom 14. Juli 2008 | [BremHilfeG vom 21. Juni 2016](http://transparenz.bremen.de/sixcms/detail.php?gsid=bremen2014_tp.c.85570.de&asl=bremen203_tpgesetz.c.55340.de&template=20_gp_ifg_meta_detail_d) | [HmbRDG - vom 9. Juni 1992](http://www.landesrecht-hamburg.de/jportal/portal/page/bshaprod.psml?showdoccase=1&st=lr&doc.id=jlr-RettDGHA1992rahmen), zuletzt geändert 20.07.2017 | [HRDG vom 16. Dezember 2010, zuletzt geändert 13.12.2012](https://beck-online.beck.de/?vpath=bibdata/komm_pdk/PdK-He-K23He/ges/HESRDG/cont/PdK-He-K23He.HESRDG%2Ehtm) | [RDG M-V vom 9. Februar 2015](http://www.landesrecht-mv.de/jportal/portal/page/bsmvprod.psml?showdoccase=1&st=lr&doc.id=jlr-RettDGMV2015rahmen&doc.part=X&doc.origin=bs) | [NRettDG vom 2. Oktober 2007](http://www.nds-voris.de/jportal/?quelle=jlink&query=RettDG+ND&psml=bsvorisprod.psml&max=true&aiz=true), zuletzt geändert 14.12.2016 | [RettG NRW vom 24. November 1992, zuletzt geändert 17.12.201](https://recht.nrw.de/lmi/owa/br_text_anzeigen?v_id=10000000000000000325)5 | [RettDG vom 22. April 1991](http://landesrecht.rlp.de/jportal/?quelle=jlink&query=RettDG+RP&psml=bsrlpprod.psml), zuletzt geändert 18.06.2013 | [SRettG vom 09.02.1994, zuletzt geändert 25.10.2011](http://www.lexsoft.de/cgi-bin/lexsoft/justizportal_nrw.cgi?xid=148054,1) | [SächsBRKG](https://www.revosax.sachsen.de/vorschrift/4911) vom 24. Juni 2004, zuletzt geändert 10.08.2015 | [RettDG LSA vom 18. Dezember 2012](http://www.landesrecht.sachsen-anhalt.de/jportal/?quelle=jlink&query=RettDG+ST&psml=bssahprod.psml&max=true), zuletzt geändert 26.10.2017 | [RDG vom 28. März 2017](http://www.gesetze-rechtsprechung.sh.juris.de/jportal/?quelle=jlink&query=RettDG+SH&psml=bsshoprod.psml&max=true&aiz=true) | [ThürRettG vom 16. Juli 2008](http://landesrecht.thueringen.de/jportal/?quelle=jlink&query=RettDG+TH&psml=bsthueprod.psml&max=true&aiz=true), zuletzt geändert 10.06.2014 |
| **Dokumentationsstil/ Datenerfassung** | | „standardisierten elektronischen Datenerfassung“  (§ 2 Abs. 3) | „Dokumentation […] nach einheitlichen Grundsätzen“ für „bayernweit einheitliche Auswertung“ (Art. 46 Abs. 3) | Festlegung durch ÄLRD (§ 5b Abs. 2) | Daten „für eine zentrale[[1]](#footnote-1) Auswertung in elektronischer Form zur Verfügung zu stellen“ (§ 19 Abs. 7) | „Personen in der Leistungserbringung (…) sind zu einer einheitlichen Dokumentation der Notfalleinsätze verpflichtet“ (§ 33 Abs. 2) |  | „differenzierte Datenerfassung“ (§ 19) | „Beförderungsaufträge und deren Abwicklung nach einheitlichen Kriterien aufgezeichnet“ (§ 15 Abs.1); „Dokumentation der Rettungseinsätze hat landeseinheitlich auf Dokumentationsblättern oder in elektronischer Form zu erfolgen“ (§ 15 Abs. 1) | „nach landeseinheitlichen Mustern über jede Fahrt eines Rettungsmittels und jeden Notarzteinsatz ein Bericht und über jede Patientenübergabe ein Protokoll“ (§ 11 Abs. 1) | „Das für das Gesundheitswesen zuständige Ministerium wird beauftragt, hierzu gemeinsam mit den Ärztekammern, den Fachverbänden der Ärztinnen und Ärzte im Rettungsdienst, der Krankenhausgesellschaft sowie den Kommunalen Spitzenverbänden die dazu notwendigen Dokumentationserfordernisse zu entwickeln.“ (§ 7a Abs. 2) | Verpflichtung, „ausreichend zu dokumentieren“ (§ 29) |  | In § 28 Verweis auf Landesrettungsdienstplan zur Dokumentation der Notarzteinsätze[[2]](#footnote-2) |  | „schriftlich oder elektronisch zu dokumentieren“ (§ 9 Abs. 3); „Anhand einer standardisierten elektronischen Datenerfassung und -auswertung ist von einer zentralen Stelle eine regelmäßige Analyse […] vorzunehmen“ (§ 10 Abs. 1); „Qualitätssicherung nach landesweit einheitlichen Kriterien“ (§ 10 Abs. 1) | „Die Aufgabenträger des bodengebundenen Rettungsdienstes haben die (…) Einsätze nach einheitlichen Grundsätzen aufzuzeichnen (§ 31 Abs. 3); |
| **Fundstelle zu Qualitätssicherung/-management** | | integriert | explizit | explizit | integriert | explizit | integriert | explizit | explizit | integriert | explizit | explizit | integriert | integriert | integriert | explizit | integriert |
| §§ 2, 10, 32 | Art. 45 „Qualitätsmanagement“ | § 5b „Aufgaben und Befugnisse der Ärztlichen Leitung Rettungsdienst, Qualitätssicherung“ | § 19 | § 33 „Qualitätsmanagement im Rettungsdienst“; § 62 „Datenverarbeitung für das Qualitätsmanagement in Rettungsdienst“ | § 5 | § 19 „Qualitätssicherung“ | § 16 „Qualitätssicherung | §§ 10, 11, 13 | § 7a „Dokumentation, Datenschutz, Qualitätsmanagement“ | § 10 „Aufsicht, Qualitätsmanagement“ | § 21a | §§ 28, 72 | §§ 6, 7, 47 | § 10 „Qualitätsmanagement“ | §§ 10, 30 |
| **Nutzung personenbezogener Daten für Qualitätssicherung** | | „Personenbezogene Daten dürfen auch verändert, gespeichert und genutzt werden  1. zur Qualitätssicherung im Rettungsdienst“  (§ 32 Abs. 2) | „Personenbezogene Daten dürfen durch die in Art. 46 Abs. 1 und 2 genannten Personen und Stellen erhoben, verarbeitet oder genutzt werden, wenn dies zur Erfüllung rettungsdienstlicher Aufgaben, insbesondere (…) zu den in Art. 45 genannten Zwecken [=Qualitätsmanagement] (…) erforderlich ist (…).“ (Art 47 Abs. 1) | Es „dürfen personenbezogene Daten verarbeitet werden, soweit dies (…) für statistische Zwecke (…) erforderlich ist.“ (§ 4 Abs.1)  Übermittlung von in Krankenhäusern erhobenen Patientendaten an ÄLRD zur QS (§ 4 Abs. 1); | „Die für die Qualitätssicherung benötigten Daten sind zu anonymisieren, auszuwerten und für eine zentrale Auswertung in elektronischer Form zur Verfügung zu stellen.“ (§ 19 Abs. 7); | „Die Einsatzdokumentation ist der Ärztlichen Leitung Rettungsdienst auf Anforderung zu übermitteln. Die Ärztliche Leitung Rettungsdienst hat die Ergebnisqualität des Rettungsdienstes im Abgleich ausgewählter in der Notfallversorgung erhobenen Daten mit den Patientinnen- und Patientendaten des weiterbehandelnden Krankenhauses (§ 62 Absatz 1) zu analysieren.“ (§ 33 Abs. 2) | Ja,  Rettungsdienstdaten und Patientendaten aus Krankenhaus zur „Qualitätskontrolle (…) genutzt und übermittelt“ werden (§ 5 Abs. 1) | Leistellendaten „zur Auswertung im Bereich der medizinischen Qualitätssicherung“ (17 Abs. 1);  „Die Leistungserbringer sind verpflichtet, (…) dem zuständigen Träger (…) die erforderlichen Auskünfte zur Erfüllung der Aufgaben der Träger des Rettungsdienstes zu erteilen.“ (§ 17 Abs. 4) | „Personenbezogene Daten sind den Trägern (…) zur Qualitäts- und Kostenkontrolle und dem Ministerium (…) zur Wahrnehmung der Fachaufsicht zu übermitteln, soweit dieser Zweck nicht mit anonymisierten Daten erreicht werden kann.“ (§ 15 Abs. 6); „Personen oder Stellen, denen bei der Durchführung des Rettungsdienstes (…) personenbezogene Daten übermittelt worden sind, dürfen diese nur für den Zweck verwenden, zu dem sie ihnen rechtmäßig übermittelt worden sind.“ (§ 15 Abs.3) | „Die Träger des Rettungsdienstes, die Kostenträger, die Beauftragten, die zentrale Koordinierungsstelle sowie der Landesausschuss ‚Rettungsdienst‘ dürfen personenbezogene Daten verarbeiten (…) für Zwecke des Qualitätsmanagements“ (§ 11 Abs. 2) | „Die Ärztliche Leitung Rettungsdienst darf personenbezogene Daten von weiter-behandelnden Institutionen sowie von Leitstellenaufzeichnungen nur verarbeiten, soweit dies erforderlich ist, um die Qualität des Rettungsdienstes zu gewährleisten und weiterzuentwickeln.“ (§ 7a Abs. 7) | Durchführende „erhalten von der jeweils zuständigen Leitstelle auf Anforderung vierteljährliche Übersichten über alle Einsatzdaten in anonymisierter Form.“ (§ 29); sonst Verweis auf § 39 des Landesgesetzes über den Brandschutz, die allgemeine Hilfe und den Katastrophenschutz ([LBKG](http://www.lexsoft.de/cgi-bin/lexsoft/justizportal_nrw.cgi?t=149933524226902021&sessionID=9241518001986652314&chosenIndex=Dummy_nv_68&templateID=document&source=context&source=context&highlighting=off&xid=187401,41))[[3]](#footnote-3) | „Die bei der Dokumentation anfallenden Daten können innerhalb des Rettungsdienstes in nicht patientenbezogener Form für Zwecke der Qualitätssicherung und Effizienzkontrolle ausgewertet werden.“  (§ 21 Abs. 4) | „Die für die Durchführung dieses Gesetzes zuständigen Aufgabenträger, Feuerwehren, Leitstellen,  Leistungserbringer (…) dürfen personenbezogene Daten (…) nur verarbeiten, (…) für Auswertungen zur Qualitätssicherung des Rettungsdienstes“  (§ 72 Abs. 1) | Daten „dürfen für Zwecke des Rettungsdienstes anonymisiert statistisch ausgewertet werden.“ (§ 20 Abs.5);  „Zu Zwecken der Planung und Bewertung leistungsfähiger Strukturen im Rettungsdienst sind dem Träger (…) auf dessen Verlangen anonymisierte Fassungen der Protokolle zur Verfügung zu stellen.“ (§ 20 Abs. 6)  „Die (…) personenbezogenen Daten sowie die Daten von Patienten in einer medizinischen Einrichtung dürfen zur Qualitätskontrolle im Rettungsdienst von den im Einsatz beteiligten Ärzten oder deren vorgesetzten ärztlichen Personen verarbeitet1 oder genutzt werden (…)“ (§ 47 Abs. 2) | „Personenbezogene Daten dürfen im erforderlichen Umfang nur für folgenden Zwecke erhoben und weiterverarbeitet werden: (…) Qualitätsmanagement“  (§ 9 Abs 2) | personenbezogene Daten dürfen „gespeichert, übermittelt oder genutzt werden (…) für Zwecke der Qualitätssicherung“  (§ 30 Abs. 3) |
| **Nutzung personenbezogener Daten für QS auch durch Dritte** | | Ja  (§ 32 Abs. 3) | Ja, s. o. (Art. 47 Abs. 1) sowie „Die Übermittlung von personenbezogenen Daten an andere als die in Art. 46 Abs. 1 und 2 genannten Personen und Stellen ist zulässig, wenn die Kenntnis dieser Daten zur Erfüllung ihrer Aufgaben erforderlich ist, die Aufgaben nicht auch mit anonymisierten oder pseudonymisierten Daten erfüllt werden könnten und das Interesse an der Übermittlung der Daten das Interesse des Betroffenen an dem Ausschluss der Übermittlung erheblich überwiegt.“ (Abs. 2) | Verarbeitung „für statistische Zwecke“ (§ 4 Abs. 1) | s.o. (§ 19 Abs. 7) sowie „Personen oder Stellen, denen im Zusammenhang mit der Durchführung des Rettungsdienstes erhobene oder gespeicherte personenbezogene Daten übermittelt worden sind, dürfen diese nur im Rahmen des Übermittlungszwecks verwenden.“ (§ 19 Abs. 8) | „Die zum Zwecke der Qualitätskontrolle gespeicherten personenbezogenen Daten (…) können (…) für wissenschaftliche medizinische Forschungsvorhaben verarbeitet werden“ (§ 62 Abs. 3) | s. o. | Leitstellendaten dürfen für QS weiterverarbeitet werden (§ 17 Abs. 1) |  | s. o. | s.o. |  |  | s. o. (§ 72 Abs. 1), zugleich am RD Beteiligte zur „Offenbarung befugt, wenn dies für die in Absatz 1 genannten Zwecke [z.B. QS] zwingend erforderlich ist.“ (§ 72 Abs. 2) | „(…) insbesondere dürfen die bei der Notfallrettung (…) tätigen Personen personenbezogene Daten, die ihnen bei ihrer Tätigkeit bekannt geworden sind, nicht unbefugt offenbaren. Sie sind zur Offenbarung gegenüber Dritten befugt, wenn die in Absatz 1 genannten Voraussetzungen vorliegen oder ein Arzt zur Offenbarung befugt wäre.“ (§ 47 Abs. 3) [Absatz 1 beinhaltet jedoch nicht die QS] | Ja, für „Qualitätssicherung“ (§ 9 Abs. 2 Nr. 8) und „Datenverarbeitung im Auftrag“  (§ 9 Abs. 2 Nr. 13) | s. o. |
| **Regelmäßigkeit der Auswertung** | | „regelmäßige Analyse“ (§ 2 Abs. 3) | „fortdauernd“ (Art. 46 Abs. 2) |  | „jährliche Auswertung der Qualitätssicherungsmaßnahmen“ (§ 15 Abs. 1) |  |  | „regelmäßige Analyse“ (§ 19) | „regelmäßige Analyse“ (§ 16) |  | „regelmäßige Analyse“ (§ 7a Abs. 2) | Leistellen auf Anforderung vierteljährig anonymisierte Einsatzdaten an Leistungserbringer (§ 29) | „jährlich einen Bericht“ (§ 21a Abs. 4) |  | „regelmäßig Statistiken über die Einsätze der Notfallrettung“ (§ 20 Abs. 2) | „regelmäßige Analyse“ (§ 10 Abs. 1) | „Die Aufgabenträger des bodengebundenen Rettungsdienstes haben die (…) Einsätze (…) regelmäßig auszuwerten.“ (§ 31 Abs. 3) |
| **Zuständigkeit für Qualitätssicherung oder -management** | **ÄLRD** |  | Ja, ÄLRD (Art. 12 Abs. 1) | Ja, ÄLRD (§ 5b) | Ja, ÄLRD (§ 15; § 19 Abs. 7) | Ja, ÄLRD (§ 33) |  | Ja, ÄLRD (§ 20) | ÄLRD eingesetzt (§ 10) – jedoch keine explizite Nennung der QS als Aufgabe | Ja, ÄLRD (§ 10 Abs. 3) | Ja, ÄLRD (§§ 7, 7a) | Ja, ÄLRD (§ 10) | Ja, ÄLRD (§ 21a) | Ja, ÄLRD (§ 28) | ÄLRD (§ 10) mit Beratungs- und Überwachungsaufgaben [keine explizite Nennung der QS, aber Einsichtnahme in Protokolle erlaubt] | ÄLRD eingesetzt (§ 11) – jedoch keine explizite Nennung der QS als Aufgabe | Ja, ÄLRD (§ 31, Abs. 2 Nr. 3) |
| **Sonstige** | „Die am Rettungsdienst Beteiligten sind verpflichtet, Maßnahmen durchzuführen und zu unterstützen, die die Qualität im Rettungsdienst sichern.“ (§ 2 Abs. 3); „Dies umfasst auch die Mitwirkung an der landesweiten Qualitätssicherung und die Implementierung von anerkannten Qualitätsmanagementsystemen“ (ebenda);  „von einer zentralen Stelle eine regelmäßige Analyse“ (ebenda) | „Alle am Rettungsdienst Beteiligten sind verpflichtet, Maßnahmen durchzuführen und zu unterstützen, die die Qualität der Leistungserbringung sichern.“ (Art. 45 Abs. 1)  „Die Unternehmer, die Durchführenden des Rettungsdienstes, die Kassenärztliche Vereinigung Bayerns und die mit der Sicherstellung der Mitwirkung von Verlegungsärzten Beauftragten haben (…) die Dokumentation fortdauernd auszuwerten und (…) als Grundlage des Qualitätsmanagements (…) zu verwenden.“ (Art. 46 Abs. 2);  Bezirksbeauftragte für „die überregionale (…) Steuerung des Qualitätsmanagements.“ (Art. 12 Abs. 2);  Landesbeauftragte „leitet das notfallmedizinische Qualitätsmanagement landesweit“ (Art. 12 Abs. 3);  „Der Zweckverband für Rettungsdienst und Feuerwehralarmierung und die Rettungsdienstbehörden können verlangen, dass ihnen oder von ihnen beauftragten Dritten die Einsatzdokumentationen und die Ergebnisse der Auswertung zur Verfügung gestellt werden, soweit dies für ihre Aufgabenerledigung erforderlich ist.“ (Art 46 Abs. 4) |  |  | „Der Rettungsdienst wird in medizinischen Fragen und Angelegenheiten des Qualitätsmanagements von einer Ärztlichen Leitung Rettungsdienst geleitet (…).“ (§ 31);  „Die medizinische und technische Weiterentwicklung erfordert eine regelmäßige Anpassung des Standards in der Notfallversorgung sowie ein Qualitätsmanagement. Aufgabenträger und Leistungserbringer erarbeiten hierzu dem jeweiligen Stand wissenschaftlicher Erkenntnisse entsprechende Zielvorstellungen, die in Abstimmung mit den Kostenträgern zur Gewährleistung einer am anerkannten Standard ausgerichteten wirtschaftlichen Leistungserbringung umzusetzen sind.“  (§ 33 Abs.1) |  | „Die Träger (…) stellen sicher, dass geeignete Qualitätsmanagementstrukturen geschaffen werden. Diese sollen unter Mitwirkung aller Beteiligten anhand einer differenzierten Datenerfassung und -auswertung eine regelmäßige Analyse der Struktur-, Prozess- und Ergebnisqualität des Rettungsdienstes ermöglichen, um daraus mögliche Verbesserungen zu ermitteln und deren Umsetzung zu realisieren.“ (§ 19); Landesbeirat (§ 16 Abs. 1); | „Die Träger (…) stellen sicher, dass geeignete Qualitätsmanagementstrukturen geschaffen werden. Diese sollen unter Mitwirkung aller Beteiligten anhand einer differenzierten Datenerfassung und -auswertung (…) eine umfassende und regelmäßige Analyse der Struktur-, Prozess- und Ergebnisqualität des Rettungsdienstes ermöglichen, um daraus mögliche Verbesserungen zu ermitteln und deren Umsetzung zu realisieren.“ (§ 16)  „Personenbezogene Daten sind den Trägern des öffentlichen Rettungsdienstes zur Qualitäts- und Kostenkontrolle und dem Ministerium für Arbeit, Gleichstellung und Soziales zur Wahrnehmung der Fachaufsicht zu übermitteln, soweit dieser Zweck nicht mit anonymisierten Daten erreicht werden kann.“ (§ 15 Abs. 6) | „Die Träger des Rettungsdienstes, die Kostenträger, die Beauftragten, die zentrale Koordinierungsstelle sowie der Landesausschuss „Rettungsdienst“ dürfen personenbezogene Daten verarbeiten (…) für Zwecke des Qualitätsmanagements,“ (§ 11 Abs. 2)  „Der Landesausschuss ‚Rettungsdienst‘ berät die Träger des Rettungsdienstes und die Beauftragten und befasst sich mit Grundfragen des Rettungsdienstes und seiner Fortentwicklung, insbesondere mit Qualitätsstandards für die Notfallrettung und Qualitätsmanagement im Rettungsdienst.“ (§ 13 Abs. 2); | „Die Träger des Rettungsdienstes wirken darauf hin, dass geeignete Qualitätsmanagementstrukturen geschaffen werden. Diese sollen unter Mitwirkung aller Beteiligten anhand einer differenzierten Datenerfassung und -auswertung eine regelmäßige Analyse der Struktur-, Prozess- und Ergebnisqualität des Rettungsdienstes ermöglichen, um daraus etwaige Verbesserungen zu ermitteln und deren Umsetzung zu realisieren. (§ /a Abs. 2) |  | „Die bei der Dokumentation anfallenden Daten können innerhalb des Rettungsdienstes in nicht patientenbezogener Form für Zwecke der Qualitätssicherung und Effizienzkontrolle ausgewertet werden.“ (§ 21 Abs. 4) |  | „können (…) Statistiken bei den Leistungserbringern abgefordert werden“ (§ 20 Abs. 2)  „Qualitätskontrolle im Rettungsdienst von den im Einsatz beteiligten Ärzten oder deren vorgesetzten ärztlichen Personen“ (§ 47 Abs. 2)  „Der Träger (…) kann Daten über Einsätze des Rettungsdienstes zum Zwecke der Planung und der Überprüfung der Leistungsfähigkeit des Rettungsdienstes im Rettungsdienstbereich unter Wahrung der Anonymität der Patienten erheben. Die Leistungserbringer sind verpflichtet bei der Datenerhebung mitzuwirken.“ (§ 7 Abs. 5)  Landesbeirat soll Ministerium zu Qualitätsstandards und -management beraten (§ 6 Abs. 4) | Träger „sind verpflichtet, Maßnahmen durchzuführen und zu unterstützen, die die Qualität im Rettungsdienst sichern. Dies umfasst auch die Qualitätssicherung nach landesweit einheitlichen Kriterien und die Implementierung von wissenschaftlich anerkannten Qualitätsmanagementsystemen. Anhand einer standardisierten elektronischen Datenerfassung und -auswertung ist von einer zentralen Stelle eine regelmäßige Analyse der Struktur-, Prozess- und Ergebnisqualität des Rettungsdienstes vorzunehmen, um daraus mögliche Verbesserungen zu ermitteln und deren Umsetzung zu realisieren.“ (§ 10 Abs. 1); Leistungserbringer „wirken an dem Qualitätsmanagement mit.“ (§ 10 Abs. 1); „Ist zur Ermittlung der Wirksamkeit rettungsdienstlicher Maßnahmen die Datenerhebung bei Behandlungseinrichtungen erforderlich, ist die Behandlungseinrichtung zur Übermittlung dieser Daten an den Rettungsdienstträger oder die Beauftragten nach § 5 [= Leistungserbringer] verpflichtet.“ (§ 10 Abs. 3) | Aufgabenträger haben Einsätze „nach einheitlichen Grundsätzen aufzuzeichnen und regelmäßig auszuwerten“ (§ 31 Abs. 3); „Die Aufsichtsbehörden können verlangen, dass ihnen in anonymisierter Form die Ergebnisse der Auswertung und bei Erfordernis die Einsatzdokumentationen für Zwecke der landesweiten Auswertung der Rettungsdiensteinsätze zur Verfügung gestellt werden.“ (§ 31 Abs. 3);  Landesrettungsdienstplan durch Ministerium und Landesbeirat „kann Maßnahmen der Qualitätssicherung bestimmen“ (§ 10) |
| **Datennutzung explizit für wissenschaftliche Forschung/ Auswertungen** | |  | Ja  (Art. 46 Abs. 3 und Art. 47 Abs. 1) | Ja, ÄLRD sollen an „medizinisch-wissenschaftlichen Forschungsprojekten“ mitwirken (§ 5b Abs. 2), Datennutzung in Verbindung mit § 4 Abs. 1 erlaubt |  | Ja (§62 Abs. 3) |  |  |  |  |  |  |  |  |  | Ja  (§ 9 Abs. 2 Nr.10; § 10 Abs. 2) |  |

Erläuterungen:

Da der Eindruck entsteht, dass in den Ländergesetzen die Begriffe „Qualitätssicherung“ und „Qualitätsmanagement“ synonym verwendet werden, werden Fundstellen zu beiden Begriffen berichtet.

Der in einigen Rettungsdienstgesetzen genutzte Begriff der „Verarbeitung“ personenbezogener Daten ist im Bundesdatenschutzgesetz wie folgt definiert: „Verarbeiten ist das Speichern, Verändern, Übermitteln, Sperren und Löschen personenbezogener Daten.“ (BDSG § 3 Abs. 4)

Abkürzungen:

ÄLRD = Ärztlicher Leiter Rettungsdienst; QS = Qualitätssicherung

Stand: Zeitpunkt der Einreichung des Manuskriptes (19.10.2017)

1. Zur Begrifflichkeit „zentrale Auswertung“ zur Qualitätssicherung: Nach Auskunft von Frau Dröge des Ministeriums des Innern und für Kommunales des Landes Brandenburg werten die ÄLRD gemäß § 15 Absatz 1 Nr. 3 jährlich die Qualitätssicherungsmaßnahmen im medizinischen Bereich des Rettungsdienstes aus. Das zuständige Ministerium erhält gemäß § 19 Absatz 7 jährlich Statistiken aus den Rettungsdienstbereichen. Diese beziehen sich u.a. auf Hilfsfristen, Personalstellen und Einsätze. Die Einführung einer landesweiten Qualitätssicherung in der Rettungsmedizin ist derzeit noch nicht umgesetzt. (Stand: 14.09.2017) [↑](#footnote-ref-1)
2. Im Rettungsdienstplan: „schriftliche oder mobilelektronische Dokumentation oder Datenübermittlung (Rettungsdienstprotokoll) (…) nach den Empfehlungen der Deutschen Interdisziplinären Vereinigung für Intensiv- und Notfallmedizin e. V. (DIVI).“ (§ 9 Abs. 2 SächsLRettDPVO) [↑](#footnote-ref-2)
3. LBKG sieht implizit keine Datennutzung für QS vor (§ 39 Abs. 2 und 3), außer „Gespräche, die auf für die Entgegennahme von Notrufen vorgesehenen Leitstellenanschlüssen geführt werden (…) dürfen darüber hinaus zur Evaluation oder zur Verfahrensverbesserung verarbeitet werden. Zu wissenschaftlichen Zwecken dürfen sie genutzt werden, wenn die darin enthaltenen personenbezogenen Daten vorher anonymisiert wurden.“ (§ 39 Abs. 4) [↑](#footnote-ref-3)
